# Supplementary material for: A 12-week aerobic exercise intervention results in improved metabolic function and lower adipose tissue and ectopic fat in high-fat diet fed rats
Source: PubMed Central journal article supplement (PMC7846962; doi:10.1042/bsr20201707), 2021-01-29
Supplement: BSR-2020-1707_supp.pdf [file BSR-2020-1707_supp.pdf]

## Supplementary Section

### Supplementary Table. 1. Diet composition

Composition of control diet (10% kilocalories including 17% protein, 73% carbohydrate, and 10% fat) and high fat diet (40% kilocalories including 17% protein, 43% carbohydrate, and 40% fat) in gm. (Research Diet Inc)

| Control diet                 |      | High fat diet (HFD) (D12079B) |         |
|------------------------------|------|-------------------------------|---------|
| Oil                          | 6.0  | Corn oil                      | 0.9985  |
| Casein                       | 24.5 | Casein- Vitamin free          | 19.4700 |
| Sucrose                      | 10.0 | Sucrose                       | 34.0476 |
| Starch                       | 46.5 | Corn starch                   | 4.9923  |
| Vitamin mix (AIN 76)         | 1.0  | Vitamin mix (AIN76)           | 0.9985  |
| Mineral mix (Oriental Yeast) | 7.0  | Mineral mix (AIN76)           | 3.4946  |
| Cellulose powder             | 5.0  | Cellulose powder              | 4.9923  |
|                              |      | Maltodextrin                  | 9.9846  |
|                              |      | Calcium carbonate             | 0.3994  |
|                              |      | DL-Methionine                 | 0.2995  |
|                              |      | Choline Bitartrate            | 0.1997  |
|                              |      | Cholesterol                   | 0.1498  |
|                              |      | Ethoxyquin                    | 0.0040  |
|                              |      | Milk fat                      | 19.9692 |

**Supplementary Table. 2.** Baseline measurement of blood chemistry and ectopic fat

Baseline physiological measurements and ectopic fat quantification. Group differences at baseline were analyzed by one-way ANOVA.

| <b>Measurements</b>   | <b>Control</b> | <b>Exercise</b> | <b>HFD</b>   | <b>HFD +<br/>Exercise</b> | <b>P-value</b> |
|-----------------------|----------------|-----------------|--------------|---------------------------|----------------|
| Body-weight (g)       | 239.0 ± 9.4    | 247.2 ± 9.1     | 283.8 ± 5.6  | 283.0 ± 7.4               | 0.002          |
| Insulin (ng/ml)       | 0.44 ± 0.05    | 0.79 ± 0.18     | 0.35 ± 0.05  | 0.50 ± 0.08               | 0.042          |
| HOMA-IR (units)       | 2.44 ± 0.29    | 4.80 ± 1.03     | 2.00 ± 0.32  | 2.79 ± 0.48               | 0.024          |
| Leptin (ng/ml)        | 1.67 ± 0.02    | 1.59 ± 0.02     | 1.72 ± 0.02  | 1.85 ± 0.05               | 1.9E-4         |
| Cholesterol (mg/dL)   | 61.20 ± 5.89   | 73.80 ± 6.19    | 55.80 ± 1.20 | 52.20 ± 4.61              | 0.033          |
| Triglycerides (mg/dL) | 73.80 ± 8.19   | 75.00 ± 7.16    | 61.80 ± 3.75 | 61.80 ± 7.74              | 0.376          |
| IHL (%)               | 1.63 ± 0.38    | 0.92 ± 0.08     | 1.73 ± 0.32  | 1.12 ± 0.11               | 0.366          |
| IMCL/Cr               | 0.93 ± 0.07    | 1.00 ± 0.12     | 1.91 ± 0.90  | 0.89 ± 0.05               | 0.133          |

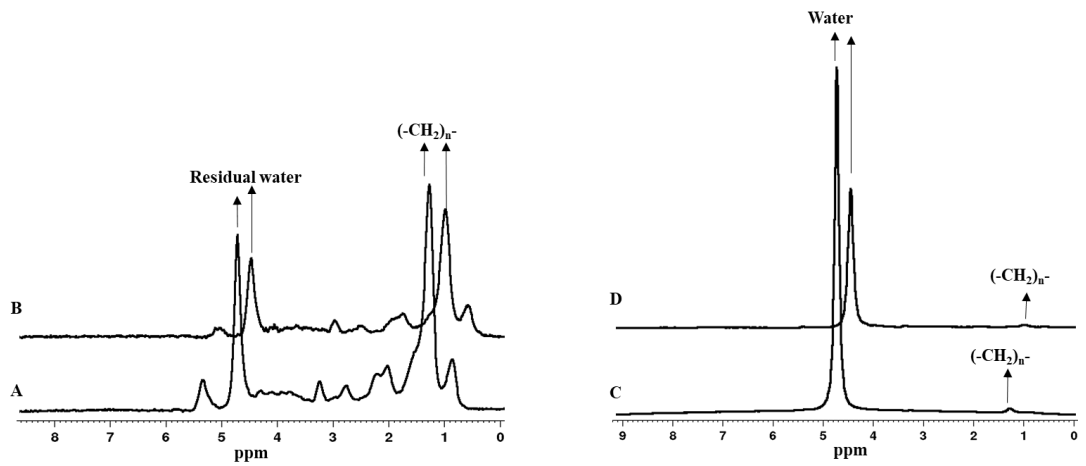

**Supplementary Figure 1.** Representative liver spectra with and without exercise intervention.

Liver spectra is shown before and after exercise intervention from a rat fed with chow diet. Baseline liver spectrum is shown in Figure 1A and Figure 1B shows the spectrum with exercise intervention. The unsuppressed water signal is shown without (Figure 1C) and with (Figure 1D) exercise intervention.

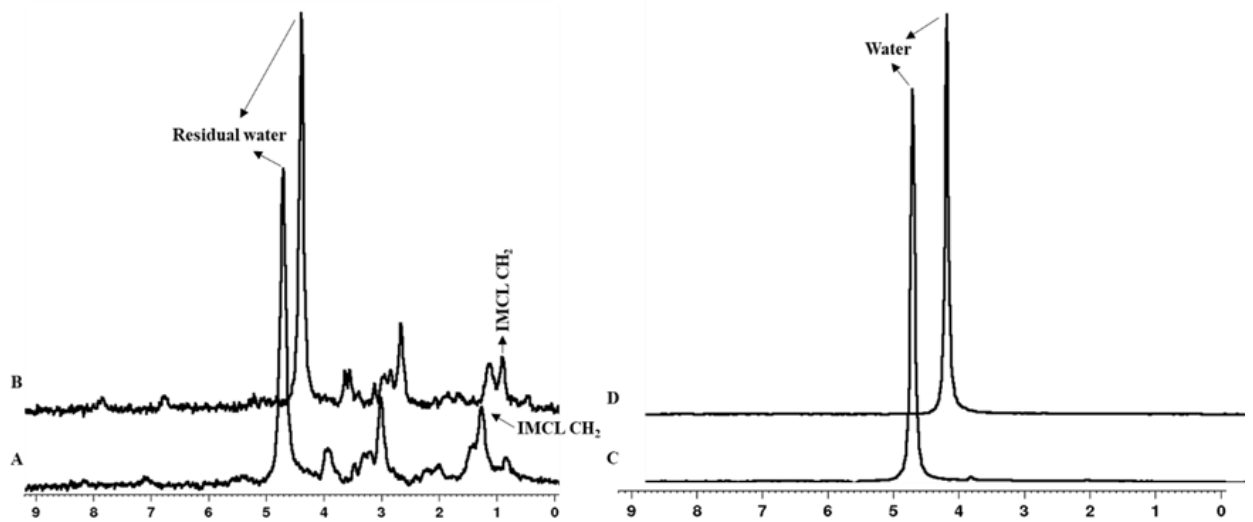

**Supplementary Figure 2.** Representative muscle spectra with and without exercise intervention.

Muscle spectra (Tibialis Anterior) is shown before and after exercise intervention from a rat fed with chow diet. Baseline muscle spectrum is shown in Figure 2A and Figure 2B shows the spectrum with exercise intervention. The unsuppressed water signal is shown without (Figure 2C) and with (Figure 2D) exercise intervention.

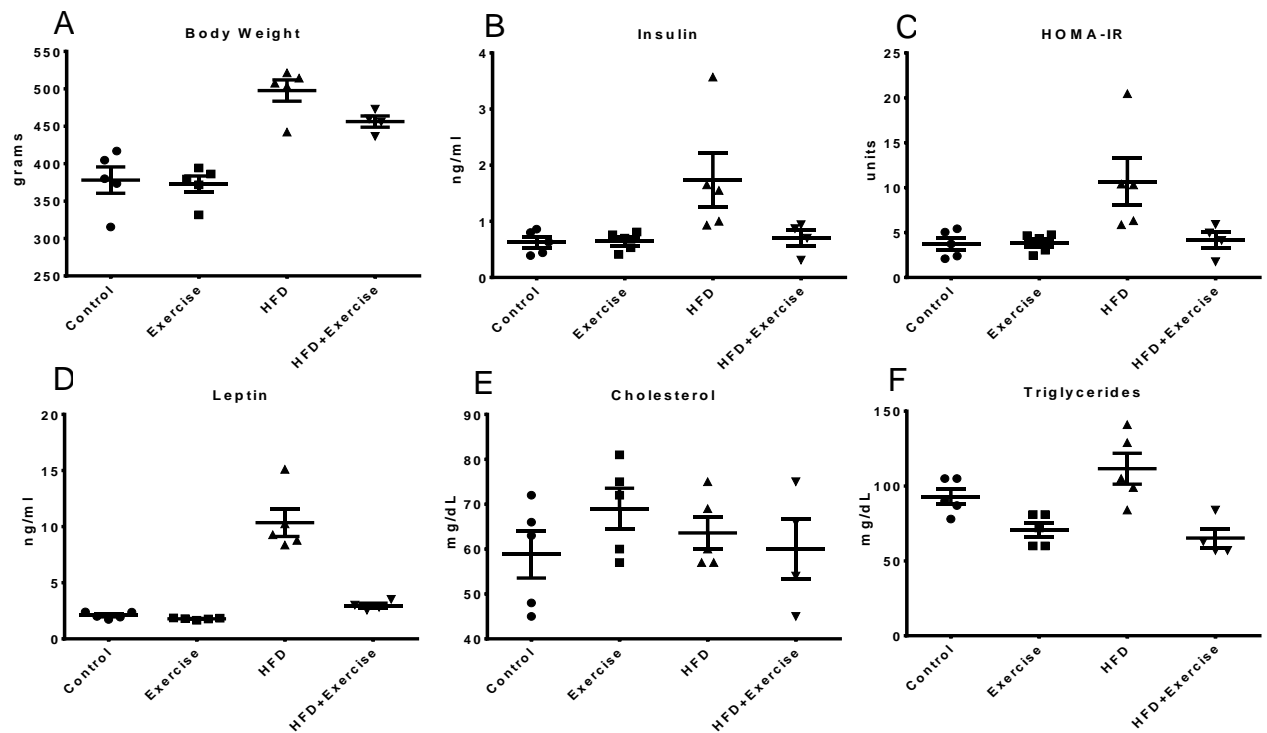

**Supplementary Figure 3.** Body weight and biochemical measurements before and after exercise intervention.

Group means of post-intervention (A) body weight and biochemical measurements including (B) insulin, (C) HOMA-IR, (D) leptin, (E) cholesterol and (F) triglyceride. Error bars indicate standard error of mean.

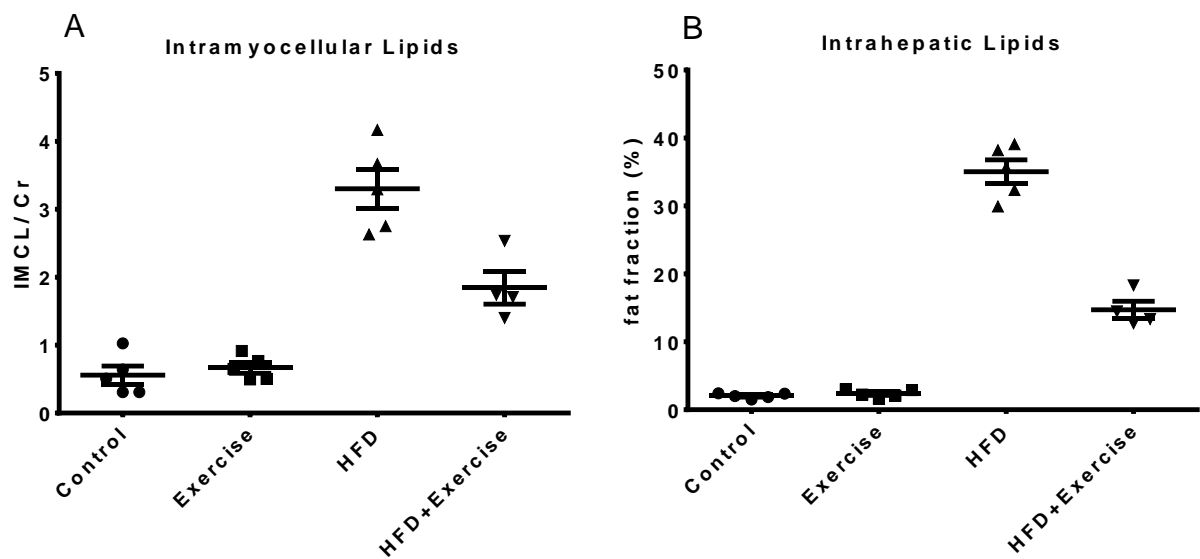

**Supplementary Figure 4.** Intramyocellular and intrahepatic lipids before and after exercise intervention.

Group means of post-intervention (A) intramyocellular lipids (IMCL) and (B) intrahepatic lipids (IHL). Error bars indicate standard error of mean.

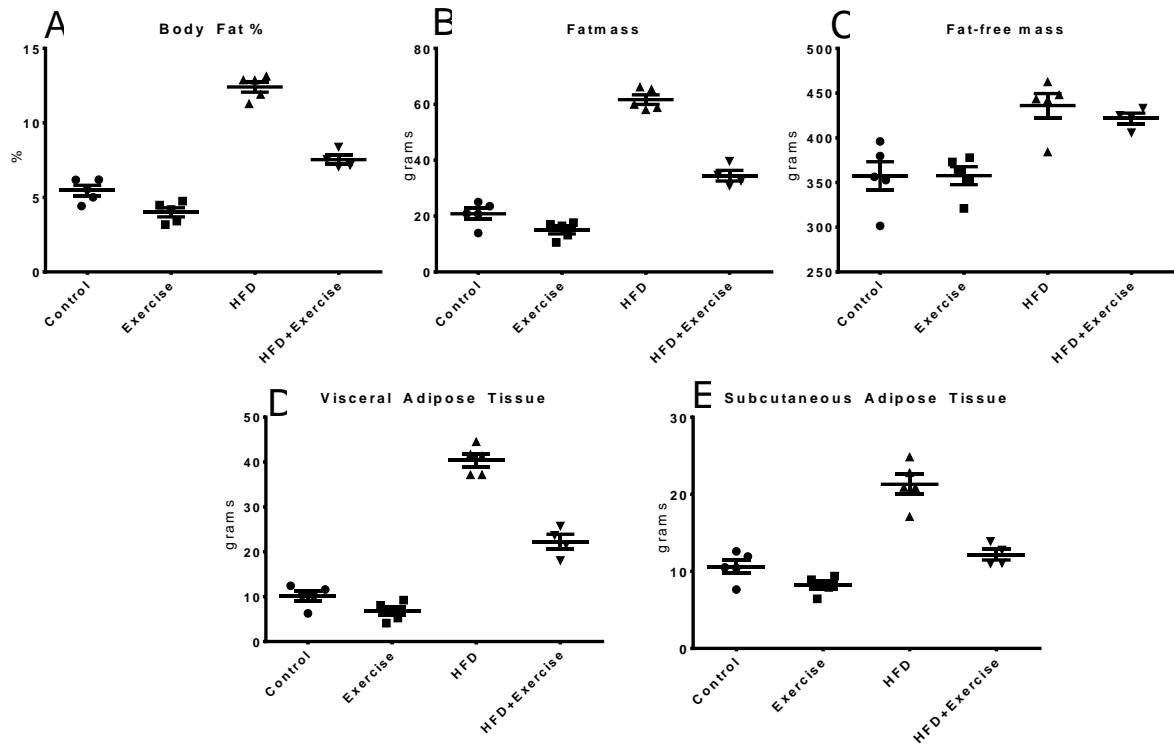

**Supplementary Figure 5.** Body fat, fat mass and adipose tissue changes before and after exercise intervention.

Group means of post-intervention (A) body fat %, (B) fatmass, (C) fat-free mass fat-pad measurements from (D) visceral adipose tissue and (E) subcutaneous adipose tissue. Error bars indicate standard error of mean.

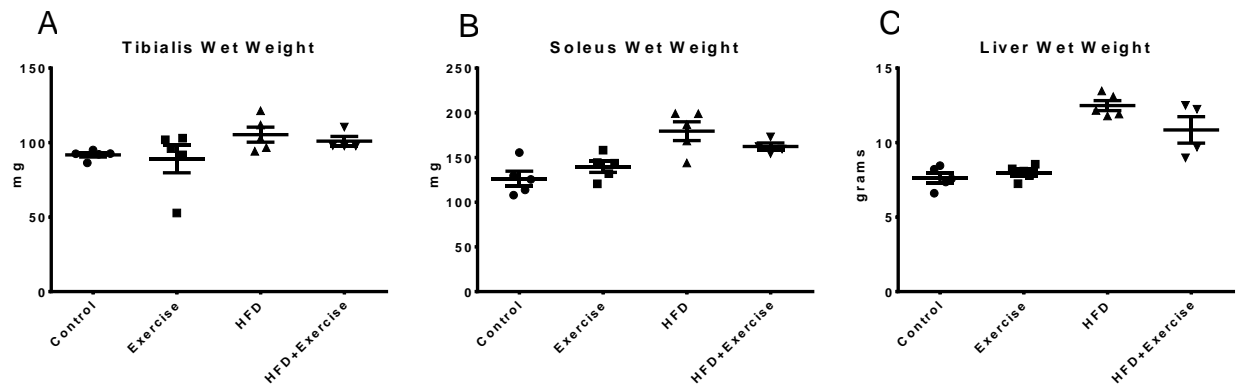

**Supplementary Figure 6.** Muscle and liver tissue quantification before and after exercise intervention.

Group means of post-intervention wet weights of (A), tibialis muscle (B) soleus muscle and (C) liver. Error bars indicate standard error of mean.
